# Supplementary material for: Microscopy investigations of the microstructural change and thermal response of cobalt-based nanoparticles confined inside a carbon nanotube medium
Source: Royal Society of Chemistry journal article supplement (doi:10.1039/c5ta00283d), 2015-01-01

## SUPPORTING INFORMATION

# Microscopy investigations of the microstructure change and thermal response of the cobalt-based nanoparticles confined inside carbon nanotubes medium

*Walid Baaziz,<sup>\*a</sup> Ileana Florea,<sup>b,c</sup> Simona Moldovan,<sup>b</sup> Vasiliki Papaefthimiou,<sup>a</sup> Spiridon Zafeiratos,<sup>a</sup> Sylvie Begin-Colin,<sup>b</sup> Dominique Begin,<sup>a</sup> Ovidiu Ersen,<sup>\*b</sup> and Cuong Pham-Huu<sup>a</sup>*

<sup>a</sup> Institut de Chimie et Procédés pour l'Energie, l'Environnement et la Santé (ICPEES), UMR 7515 du CNRS-Université de Strasbourg, 25 rue Becquerel, 67087 Strasbourg-Cedex 02, France

<sup>b</sup> Institut de Physique et Chimie des Matériaux de Strasbourg, UMR 7504 du CNRS Université de Strasbourg, 23 rue du Loess, 67037 Strasbourg-Cedex 08, France

<sup>c</sup> Laboratoire de Physique des Interfaces et Couches Minces, UMR 7647 CNRS-Ecole Polytechnique, Route de Saclay, 91128, Palaiseau-Cedex, France

**SI 1:** XPS survey scan spectra of the pristine CNTs and those heated at 650°C in UHV. Inset: detailed scans of the O1s region. The oxygen atomic content is calculated from the O1s to C1s peak area ratio assuming a homogeneous distribution of the oxygen species in the analyzed volume.

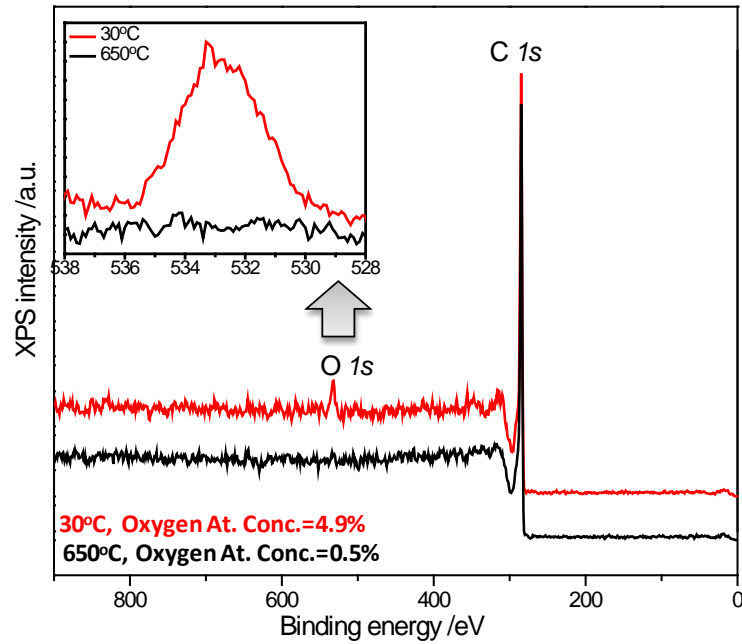

**SI 2:** TGA curve of Co-based NPs@CNTs carried out under air with a heating rate of 5°C/min. Size distribution of NPs measured from the TEM images (red lines) and fitted with a Gaussian function (black line).

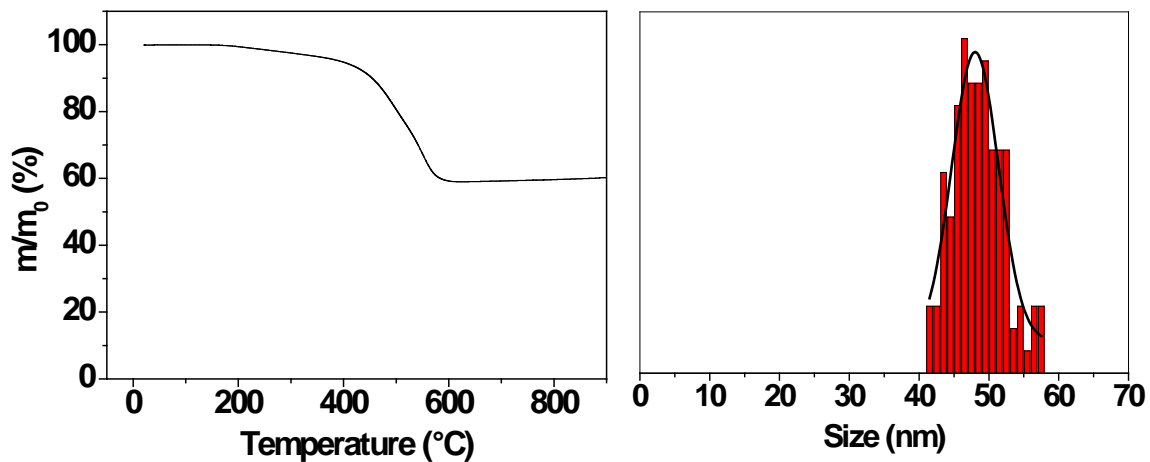

**SI 3:** TEM images of the Co-based/CNTs showing NPs localized inside the CNT's channel with closed end, confirming the high diffusion of the cobalt precursor inside the CNTs channel by the solvothermal method.

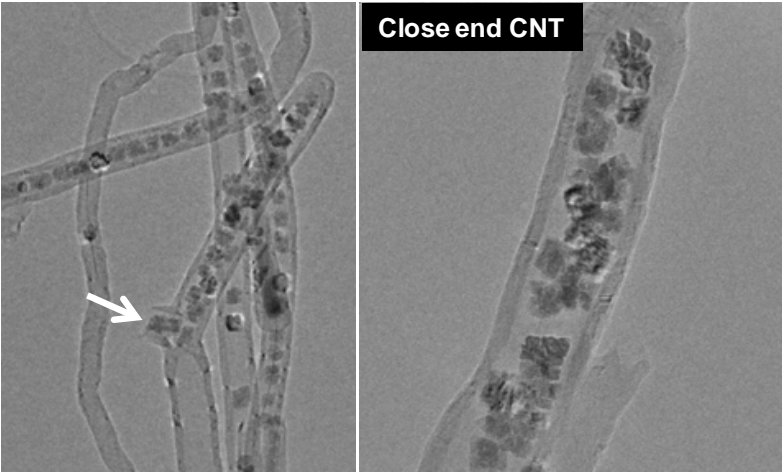

**SI 4:** Representative HAADF-STEM image and corresponding EELS spectra recorded on different areas on the nanostructures constituted of Co-based nanoparticles deposited on FLG sheets.

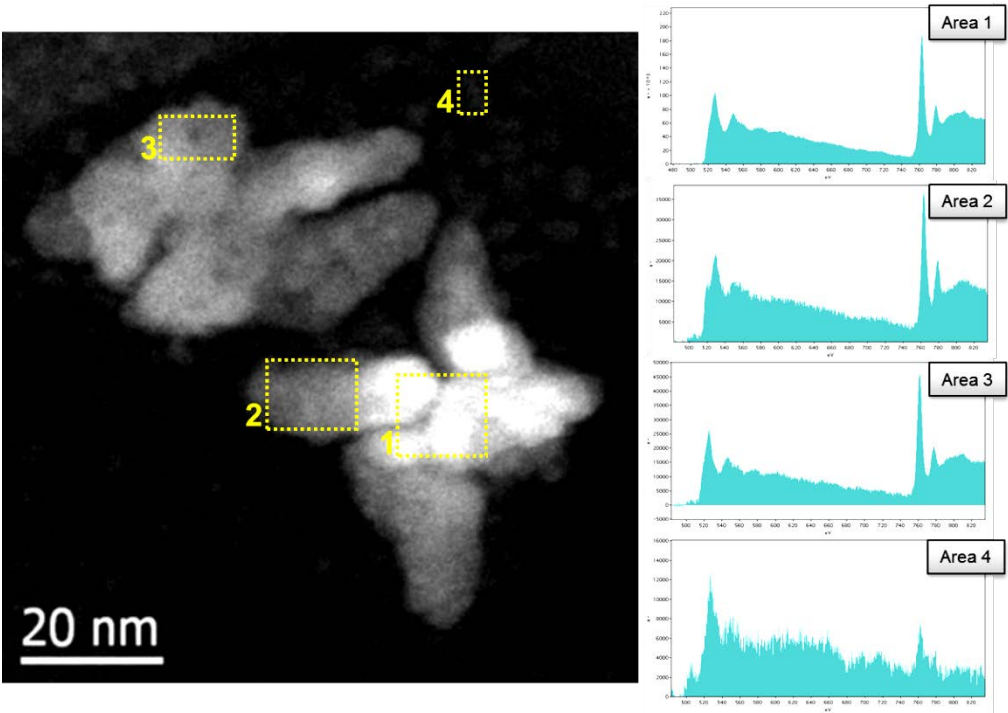

**SI 5:** TEM image of the CoO/FLG system illustrating a completely different morphology compared to that corresponding to the CoO/CNTs system where confinement effect operates.

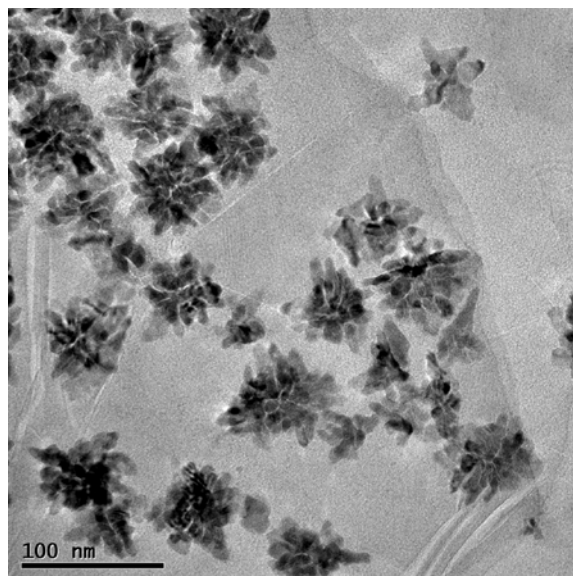

**SI 6:** Video of the 3D modeling

**SI 7:** HR HAADF-STEM analysis of Co-based NPs inside the CNTs

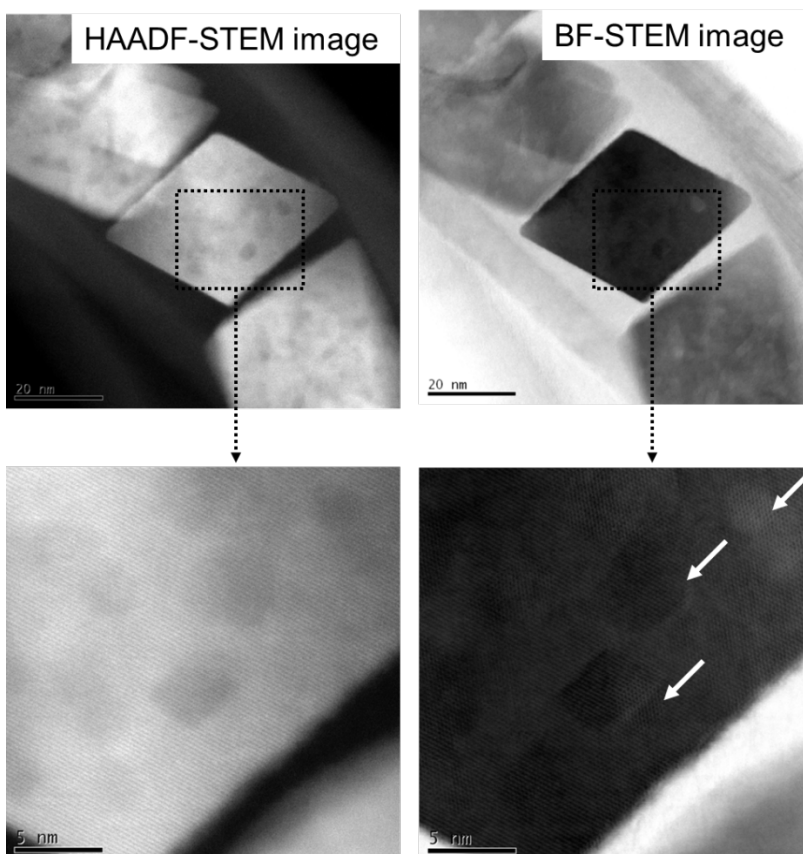

Supplement: c5ta00283d1.pdf [file c5ta00283d1.pdf]
